# Supplementary material for: Antibiotic Resistance Genes and Potentially Pathogenic Bacteria in the Central Adriatic Sea: Are They Connected to Urban Wastewater Inputs?
Source: MDPI journal article supplement (doi:10.3390/w13233335), 2021-11-24
Supplement: s1 [file s1]

# Supplementary Materials

## 1. Supplementary Tables

**Table S1.** List of samples collected in this study. DNA samples were collected in dates in bold.

| Site                | Sampling day at WWTP     | Sampling day at sea      | Marine station coordinates |
|---------------------|--------------------------|--------------------------|----------------------------|
| Francavilla al Mare | 28 April 2020            | <b>28 April 2020</b>     | 14.275°E; 42.464°N         |
|                     | <b>29 May 2020</b>       | <b>29 May 2020</b>       |                            |
|                     | <b>17 June 2020</b>      | 17 June 2020             |                            |
|                     | <b>21 July 2020</b>      | 21 July 2020             |                            |
|                     | <b>28 August 2020</b>    | 28 August 2020           |                            |
|                     | <b>22 September 2020</b> | <b>22 September 2020</b> |                            |
| Zadar               | 30 July 2019             | <b>30 July 2019</b>      | 15.236°E; 44.087°N         |
|                     | <b>13 September 2019</b> | <b>13 September 2019</b> |                            |
|                     | <b>7 November 2019</b>   | <b>7 November 2019</b>   |                            |
|                     | <b>22 April 2020</b>     | 22 April 2020            |                            |
|                     | <b>18 May 2020</b>       | 18 May 2020              |                            |
|                     | <b>18 June 2020</b>      | <b>18 June 2020</b>      |                            |
|                     | <b>27 July 2020</b>      | 27 July 2020             |                            |
|                     | <b>26 August 2020</b>    | 26 August 2020           |                            |
| Katalinića Brig     | <b>29 September 2020</b> | <b>29 September 2020</b> | 16.453°E; 43.490°N         |
|                     | 31 July 2019             | <b>31 July 2019</b>      |                            |
|                     | <b>27 February 2020</b>  | 27 February 2020         |                            |
|                     | <b>23 April 2020</b>     | <b>23 April 2020</b>     |                            |
|                     | <b>28 May 2020</b>       | <b>28 May 2020</b>       |                            |
|                     | <b>26 June 2020</b>      | 26 June 2020             |                            |
|                     | <b>22 July 2020</b>      | 22 July 2020             |                            |
|                     | <b>21 September 2020</b> | 21 September 2020        |                            |
|                     | 31 July 2019             | <b>31 July 2019</b>      |                            |
|                     | <b>27 February 2020</b>  | <b>27 February 2020</b>  |                            |
| Stobreč             | <b>23 April 2020</b>     | <b>23 April 2020</b>     | 16.518°E; 43.482°N         |
|                     | <b>28 May 2020</b>       | 28 May 2020              |                            |
|                     | <b>26 June 2020</b>      | <b>26 June 2020</b>      |                            |
|                     | <b>22 July 2020</b>      | 22 July 2020             |                            |
|                     | <b>21 September 2020</b> | 21 September 2020        |                            |

**Table S2.** Primer sets used for qPCR.

| Target                      | Primer name  | Primer sequence (5'- 3') | Amplicon size (bp) | Annealing T (°C) | Reference |
|-----------------------------|--------------|--------------------------|--------------------|------------------|-----------|
| 16SrDNA                     | Bact1369F    | CGGTGAATACGTTTCYCGG      | 142                | 55               | [51]      |
|                             | Prok1492R    | GGHTACCTTGTTACGACTT      |                    |                  |           |
| <i>ermB</i>                 | ermB Fw      | CCGAACACTAGGGTTGCTC      | 139                | 55               | [52]      |
|                             | ermB Rev     | ATCTGGAACATCTGTGGTATG    |                    |                  |           |
| <i>tetA</i>                 | tetA Fw      | GCTACATCCTGCTTGCCTTC     | 210                | 64               | [55]      |
|                             | tetA Rev     | CATAGATCGCCGTGAAGAGG     |                    |                  |           |
| <i>sulII</i>                | sulII Fw     | TCCGGTGGAGGCCGGTATCTGG   | 191                | 60               | [56]      |
|                             | sulII Rev    | CGGGAATGCCATCTGCCTTGAG   |                    |                  |           |
| <i>qnrS</i>                 | qnrS Fw      | GACGTGCTAACTTGCGTGAT     | 118                | 62               | [57]      |
|                             | qnrS Rev     | TGGCATTGTTGGAAACTTG      |                    |                  |           |
| <i>bla</i> <sub>CTX-M</sub> | blaCTX-M Fw  | CTATGGCACCACCAACGATA     | 103                | 60               | [58]      |
|                             | blaCTX-M Rev | ACGGCTTTCTGCCTTAGGTT     |                    |                  |           |
| <i>mcr-1</i>                | mcr-1 qF1    | ACACTTATGGCACGGTCTATG    | 120                | 63               | [59]      |
|                             | mcr-1 qR1    | GCACACCCAAACCAATGATAC    |                    |                  |           |
| <i>bla</i> <sub>TEM</sub>   | blaTEM Fw    | TTCCTGTTTTTGCTCACCCAG    | 112                | 60               | [60]      |
|                             | blaTEM Rev   | CTCAAGGATCTTACCGCTGTTG   |                    |                  |           |
| <i>bla</i> <sub>OXA</sub>   | Oxa-rt Fw    | AGGCACGTATGAGCAAGATG     | 189                | 60               | [61]      |
|                             | Oxa-rt Rev   | TGGCTTGTTTGACAATACGC     |                    |                  |           |

**Supplementary Table S3.** qPCR parameters for gene quantification. Melting peaks, efficiencies, and  $r^2$  are the mean of the whole data produced for all runs for each gene  $\pm$  standard deviation.

| Target                     | Melting peak    | Efficiency (%)  | $r^2$             | Standard curve<br>(copies $\mu\text{L}^{-1}$ ) | LOQ<br>(copies $\mu\text{L}^{-1}$ ) |
|----------------------------|-----------------|-----------------|-------------------|------------------------------------------------|-------------------------------------|
| 16SrDNA                    | 85.3 $\pm$ 0.7  | 100.1 $\pm$ 2.7 | 0.998 $\pm$ 0.001 | 4.23 $\times 10^5$                             | 430                                 |
|                            |                 |                 |                   | 4.23 $\times 10^4$                             |                                     |
|                            |                 |                 |                   | 4.23 $\times 10^3$                             |                                     |
|                            |                 |                 |                   | 4.23 $\times 10^2$                             |                                     |
| <i>sulII</i>               | 90.7 $\pm$ 0.3  | 98.7 $\pm$ 1.1  | 0.998 $\pm$ 0.001 | 3.36 $\times 10^5$                             | 34                                  |
|                            |                 |                 |                   | 3.36 $\times 10^4$                             |                                     |
|                            |                 |                 |                   | 3.36 $\times 10^3$                             |                                     |
|                            |                 |                 |                   | 3.36 $\times 10^2$                             |                                     |
| <i>tetA</i>                | 89.5 $\pm$ 0.2  | 97.0 $\pm$ 0.4  | 0.999 $\pm$ 0.001 | 3.36 $\times 10^1$                             | 13                                  |
|                            |                 |                 |                   | 1.23 $\times 10^5$                             |                                     |
|                            |                 |                 |                   | 1.23 $\times 10^4$                             |                                     |
|                            |                 |                 |                   | 1.23 $\times 10^3$                             |                                     |
| <i>bla<sub>OXA</sub></i>   | 83.5 $\pm$ 0.0  | 90.0 $\pm$ 0.04 | 0.999 $\pm$ 0.000 | 1.23 $\times 10^2$                             | 31                                  |
|                            |                 |                 |                   | 1.23 $\times 10^1$                             |                                     |
|                            |                 |                 |                   | 3.05 $\times 10^5$                             |                                     |
|                            |                 |                 |                   | 3.05 $\times 10^4$                             |                                     |
| <i>mcr-1</i>               | 82.8 $\pm$ 0.3  | 101.7 $\pm$ 3.8 | 0.999 $\pm$ 0.001 | 3.05 $\times 10^3$                             | 9                                   |
|                            |                 |                 |                   | 3.05 $\times 10^2$                             |                                     |
|                            |                 |                 |                   | 3.05 $\times 10^1$                             |                                     |
|                            |                 |                 |                   | 8.91 $\times 10^4$                             |                                     |
| <i>bla<sub>TEM</sub></i>   | 81.9 $\pm$ 0.4  | 99.2 $\pm$ 2.0  | 0.999 $\pm$ 0.001 | 8.91 $\times 10^3$                             | 41                                  |
|                            |                 |                 |                   | 8.91 $\times 10^2$                             |                                     |
|                            |                 |                 |                   | 8.91 $\times 10^1$                             |                                     |
|                            |                 |                 |                   | 8.91 $\times 10^0$                             |                                     |
| <i>bla<sub>CTX-M</sub></i> | 84.6 $\pm$ 0.03 | 99.2 $\pm$ 1.9  | 0.999 $\pm$ 0.001 | 4.10 $\times 10^5$                             | 14                                  |
|                            |                 |                 |                   | 4.10 $\times 10^4$                             |                                     |
|                            |                 |                 |                   | 4.10 $\times 10^3$                             |                                     |
|                            |                 |                 |                   | 4.10 $\times 10^2$                             |                                     |
| <i>ermB</i>                | 81.6 $\pm$ 0.04 | 100.5 $\pm$ 0.4 | 1.000 $\pm$ 0.001 | 4.10 $\times 10^1$                             | 25                                  |
|                            |                 |                 |                   | 1.37 $\times 10^5$                             |                                     |
|                            |                 |                 |                   | 1.37 $\times 10^4$                             |                                     |
|                            |                 |                 |                   | 1.37 $\times 10^3$                             |                                     |
| <i>qnrS</i>                | 82.5 $\pm$ 0.4  | 100.2 $\pm$ 2.4 | 0.998 $\pm$ 0.001 | 1.37 $\times 10^2$                             | 23                                  |
|                            |                 |                 |                   | 1.37 $\times 10^1$                             |                                     |
|                            |                 |                 |                   | 2.45 $\times 10^5$                             |                                     |
|                            |                 |                 |                   | 2.45 $\times 10^4$                             |                                     |
|                            |                 |                 |                   | 2.45 $\times 10^3$                             |                                     |
|                            |                 |                 |                   | 2.45 $\times 10^2$                             |                                     |
|                            |                 |                 |                   | 2.45 $\times 10^1$                             |                                     |
|                            |                 |                 |                   | 2.29 $\times 10^5$                             |                                     |
|                            |                 |                 |                   | 2.29 $\times 10^4$                             |                                     |
|                            |                 |                 |                   | 2.29 $\times 10^3$                             |                                     |
|                            |                 |                 |                   | 2.29 $\times 10^2$                             |                                     |
|                            |                 |                 |                   | 2.29 $\times 10^1$                             |                                     |

## 2. Supplementary figures

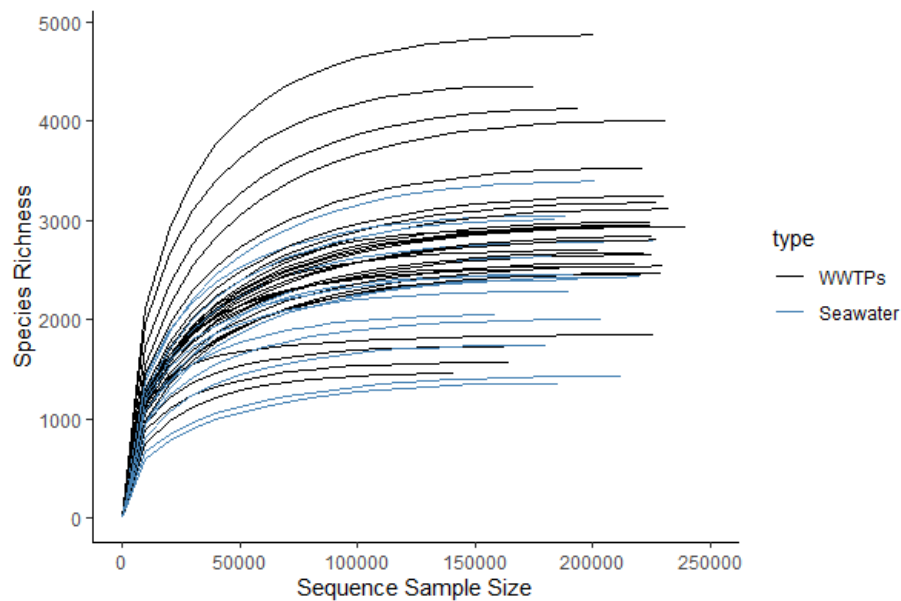

**Figure S1.** Rarefaction curves of treated sewage (WWTPs) and seawater communities based on 16S rDNA amplicon sequencing. Curves were built before performing any filtration.

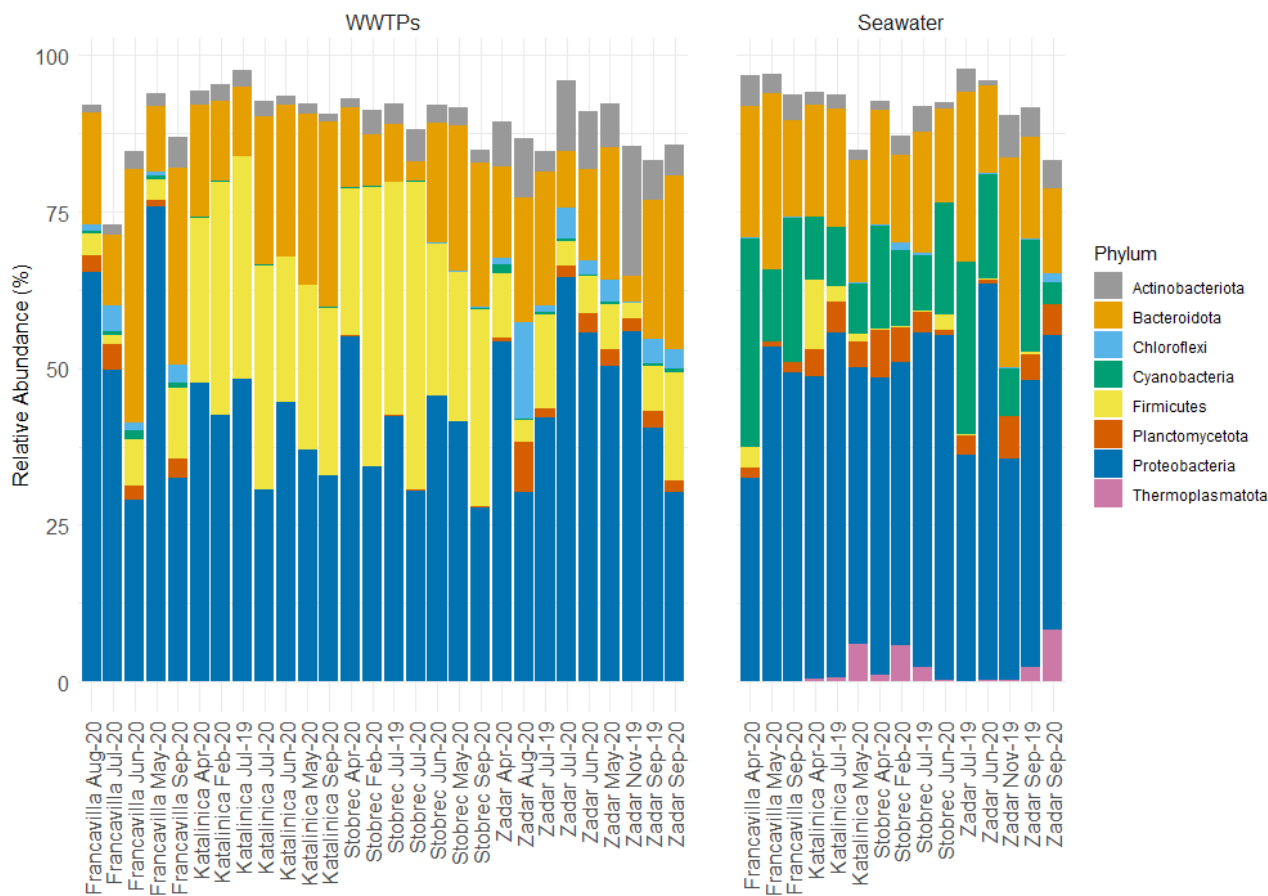

**Figure S2.** Bacterial community composition at phylum level of treated sewage (WWTPs) and seawater samples based on 16S rDNA amplicon sequencing. Only top phyla are depicted.

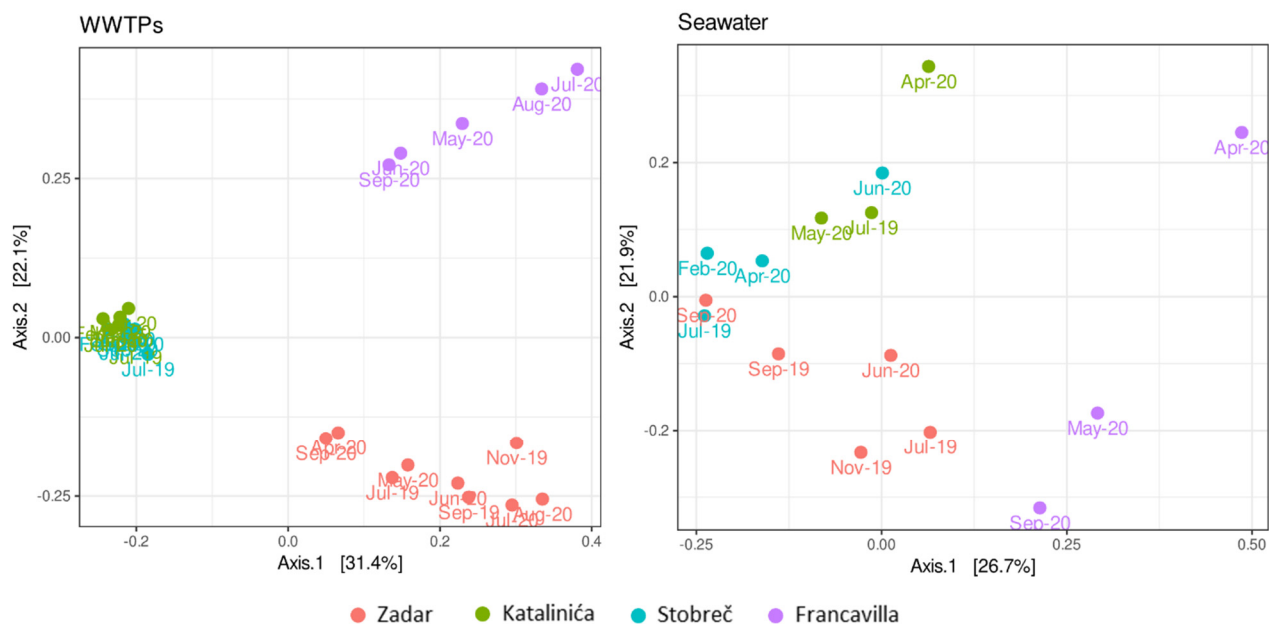

**Figure S3.** Sample ordination by PCoA of Bray-Curtis distances. In Katalinića and Stobreč WWTPs, sewage undergoes only basic mechanical treatments (i.e., "primary treatments"). Zadar and Francavilla WWTPs perform activated sludge treatment subsequently to primary treatments. Only in the case of Francavilla WWTP treated sewage undergoes a final disinfection step.

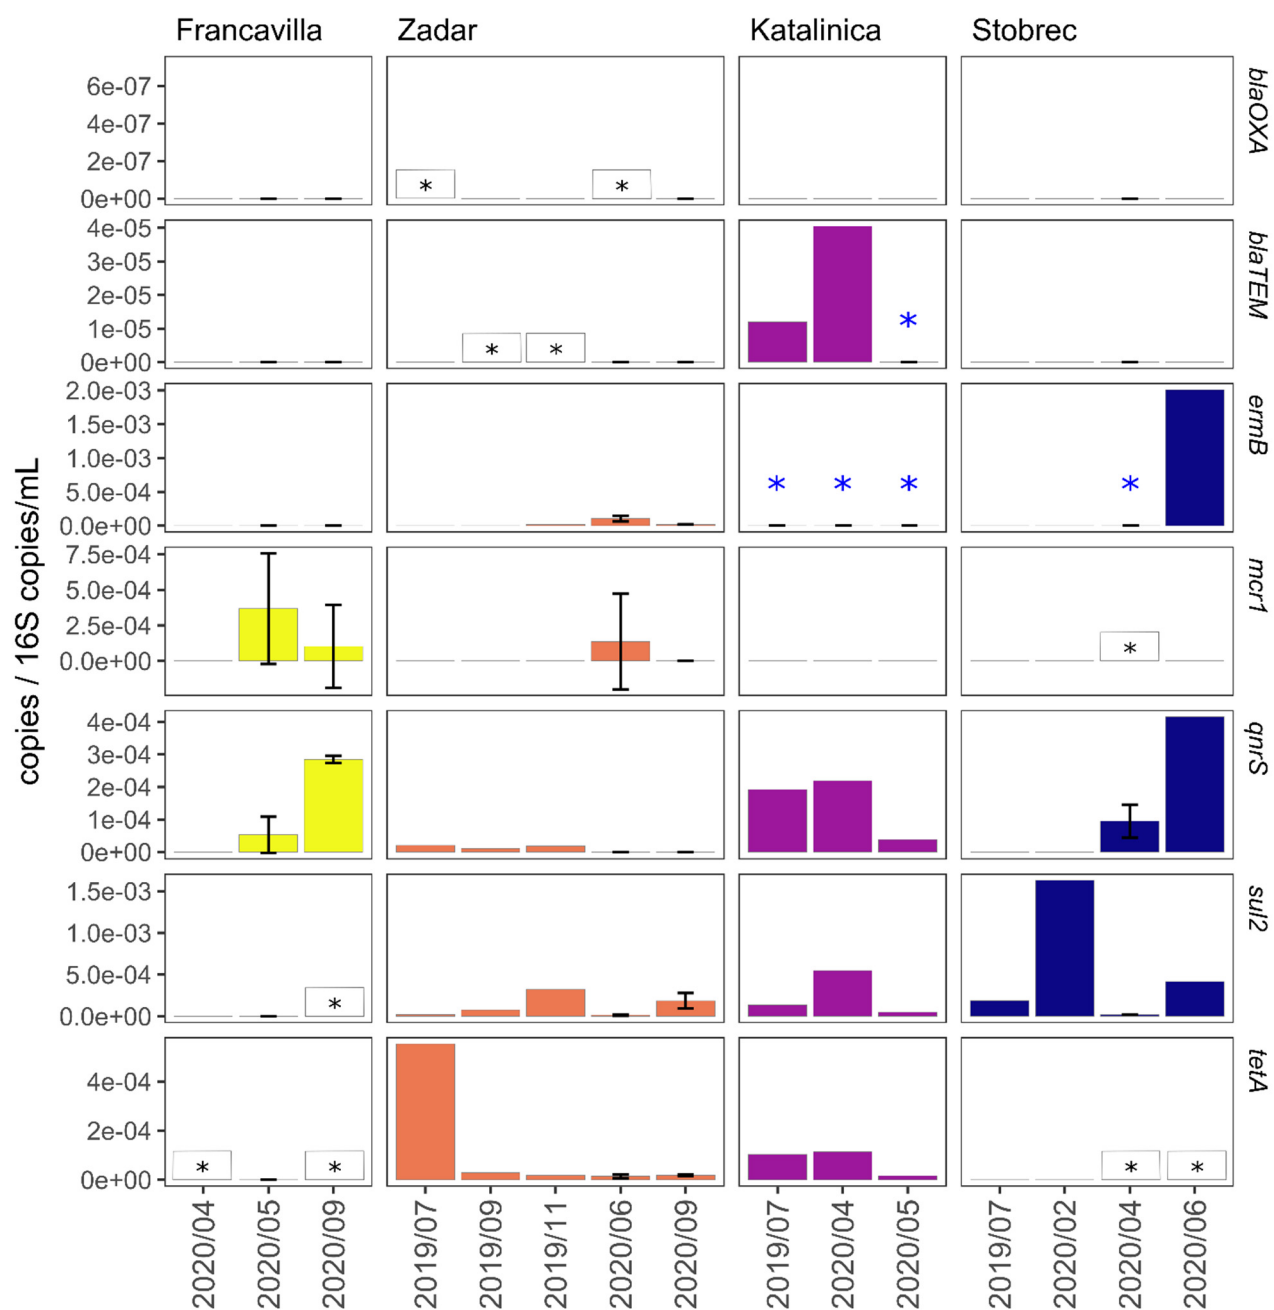

**Figure S4.** Content of ARGs in seawater samples over time. Black stars in white boxes are <LOQ values. Blue stars indicate not quantifiable samples due to primer-specificity issues. Error bars show the standard deviation between biological replicates (n.2).
